# Supplementary material
Source: HighWire-hosted journal article supplement (https://mcr.aacrjournals.org/content/suppl/2019/01/04/1541-7786.MCR-18-0391)
Supplement: 200539_3_supp_5194870_pj0t0v.pdf [file 200539_3_supp_5194870_pj0t0v.pdf]

**Supplementary Table 1.** Predictive analysis of human cortactin T24 phosphorylating kinases

| Kinase | ScanSite | Minimotif Miner | Phospho Motif finder | NetPhosK | GPS | PPSP | KinasePhos |
|--------|----------|-----------------|----------------------|----------|-----|------|------------|
| CK2    | X        | X               | X                    | X        | X   | X    |            |
| CK1    |          |                 | X                    |          |     | X    |            |
| GRK    |          |                 |                      |          | X   | X    | X          |
| DNA-PK |          |                 |                      |          |     | X    |            |
| PKB    |          |                 |                      |          |     |      | X          |

Protein Sequence: MWKASAGHAVSIAQDDAGADDWETDPDFVNDVSEKEQRWGAKTVQGSG

HQEHINIHKLRENVFQEHQTLKEKELETGPKASHGY
